# Supplementary material
Source: MDPI journal article supplement (https://www.mdpi.com/1424-2818/13/1/19)
Supplement: s1 [file s1]

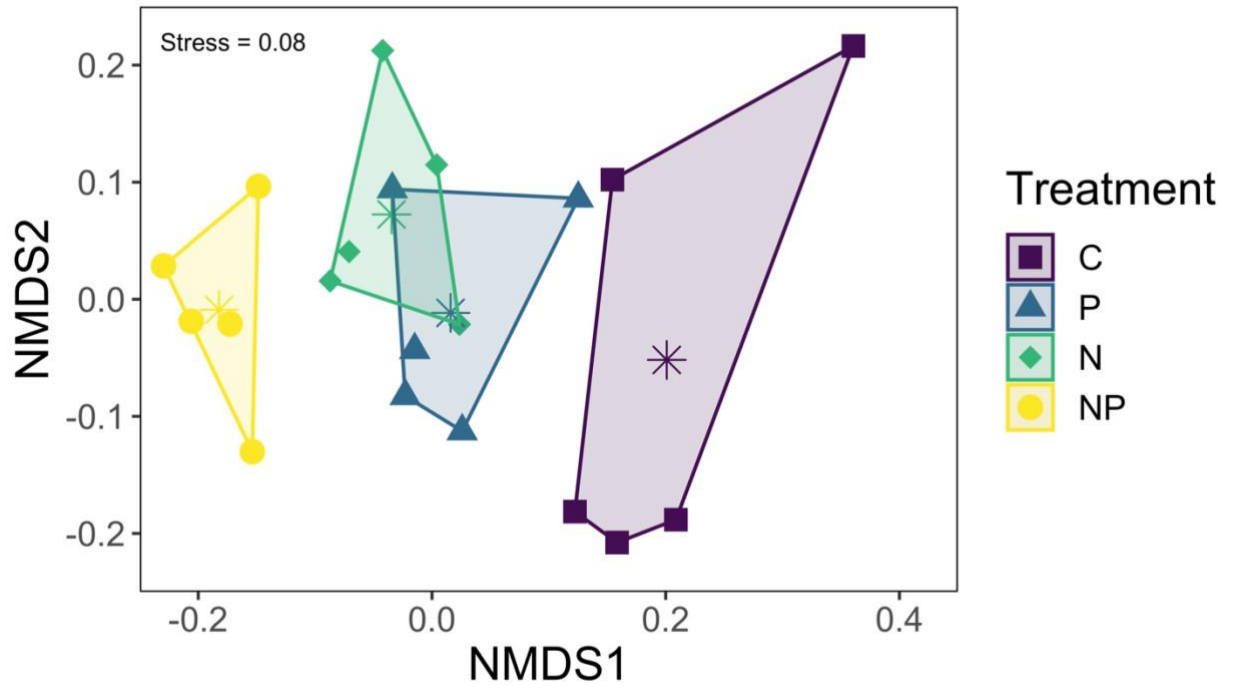

**Figure S1.** Non-metric multidimensional scaling (NMDS) of species composition grouped in convex hulls by nutrient treatment type on a barrier island grassland community. Points represent individual experimental plots in species space with stars indicating calculated centroids for each group. Colors and symbols are matched to nutrient treatment (C = control, P = phosphorus, N = nitrogen, and NP = nitrogen + phosphorus). Centroids can be viewed as mean community compositions.

**Table S1.** Directional correlations of each functional trait along PC1 and PC2 (Figure 3). Goodness-of-fit is represented as  $r^2$  and correlates with vector lengths in Figure 2. Bold indicates  $p < 0.05$ . Traits include height, specific leaf area (SLA), leaf carbon content (%C), leaf nitrogen content (%N), and leaf nitrogen isotope ratio ( $\delta^{15}\text{N}$ ).

| Trait                    | PC 1  | PC 2  | $r^2$ | $p$ -value   |
|--------------------------|-------|-------|-------|--------------|
| Height                   | -0.94 | 0.34  | 0.80  | <b>0.001</b> |
| Specific leaf area (SLA) | -0.18 | 0.98  | 0.71  | <b>0.001</b> |
| Leaf N content (%N)      | -0.33 | -0.94 | 0.61  | <b>0.001</b> |
| Leaf C content (%C)      | -0.86 | -0.51 | 0.71  | <b>0.001</b> |
| Leaf $^{15}\text{N}$     | -0.99 | 0.15  | 0.61  | <b>0.001</b> |

**Table 2.** Pairwise comparisons via PERMANOVA results for species composition between nutrient enrichment treatments in coastal grassland. Bold indicates  $p < 0.05$ , using FDR correction.

| Comparison | F-value | <i>p</i> -value |
|------------|---------|-----------------|
| C vs P     | 3.14    | <b>0.033</b>    |
| C vs N     | 4.32    | <b>0.021</b>    |
| C vs. NP   | 8.89    | <b>0.026</b>    |
| P vs N     | 2.52    | <b>0.033</b>    |
| P vs NP    | 4.35    | <b>0.021</b>    |
| N vs NP    | 2.77    | <b>0.033</b>    |

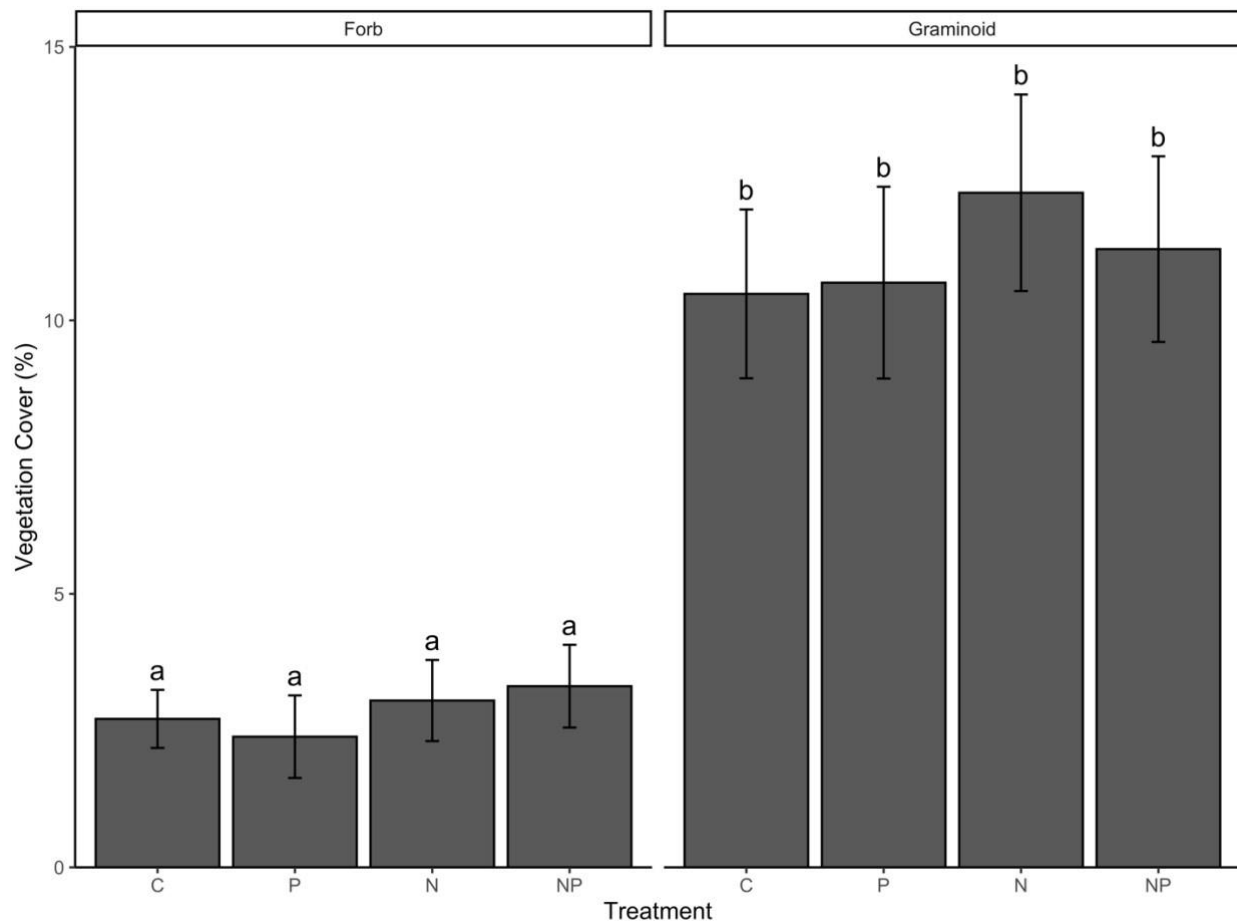

**Figure S2.** Mean percent cover  $\pm$  SE of forb and graminoid lifeforms in each nutrient treatment group on a barrier island grassland community. Bars are grouped by lifeform type as well as nutrient treatment level (C = control, P = phosphorus, N = nitrogen, and NP = nitrogen + phosphorus). Letter codes represent significant differences, such that bars with different letter codes are significantly different (Tukey HSD,  $p < 0.05$ ).
